# Supplementary material for: Essential Role for an M17 Leucine Aminopeptidase in Encystation of Acanthamoeba castellanii
Source: PubMed Central journal article supplement (PMC4468156; doi:10.1371/journal.pone.0129884), 2015-06-15

**A**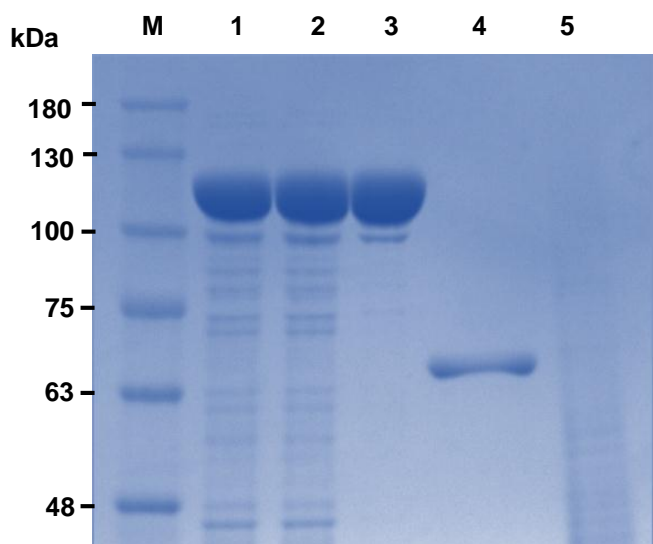**B**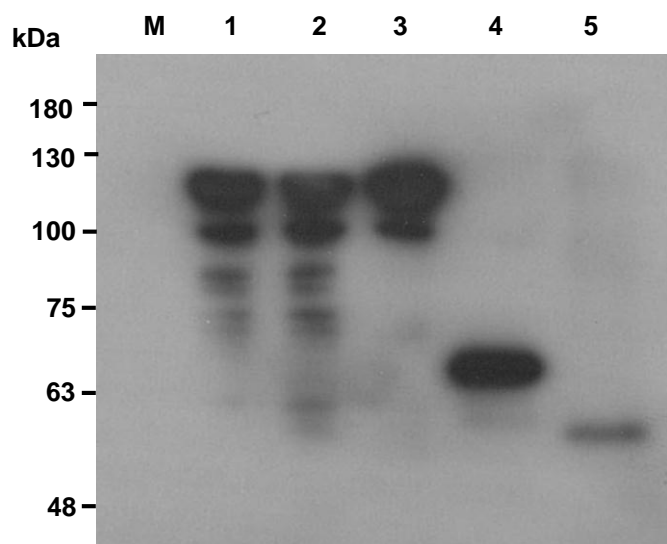

Supplement: pone.0129884.s001.pdf [file pone.0129884.s001.pdf]
